# Supplementary material for: Exceptionally High Negative Electro-Caloric Effects of Poly(VDF–co–TrFE) Based Nanocomposites Tuned by the Geometries of Barium Titanate Nanofillers
Source: MDPI journal article supplement (doi:10.3390/polym9080315), 2017-07-28
Supplement: s1 [file s1]

## Supplementary Information

# Structural, ferroelectric and electro-caloric properties of P(VDF-TrFE) based nanocomposites tuned by the geometries of barium titanate nanofillers

Zhi-Yuan Jiang<sup>1</sup>, Guang-Ping Zheng<sup>1,\*</sup>, Xiu-Cheng Zheng<sup>2,\*</sup>, and Hao Wang<sup>3,\*</sup>

<sup>1</sup> Department of Mechanical Engineering, Hong Kong Polytechnic University, Hung Hom, Kowloon, Hong Kong, China;

<sup>2</sup> College of Chemistry and Molecular Engineering, Zhengzhou University, Zhengzhou 450001, China;

<sup>3</sup> Institute of Nanosurface Science and Engineering, Shenzhen University, Shenzhen 518060, China;

\* Correspondence: [mmzheng@polyu.edu.hk](mailto:mmzheng@polyu.edu.hk); [zhxch@zzu.edu.cn](mailto:zhxch@zzu.edu.cn); [whao@szu.edu.cn](mailto:whao@szu.edu.cn)

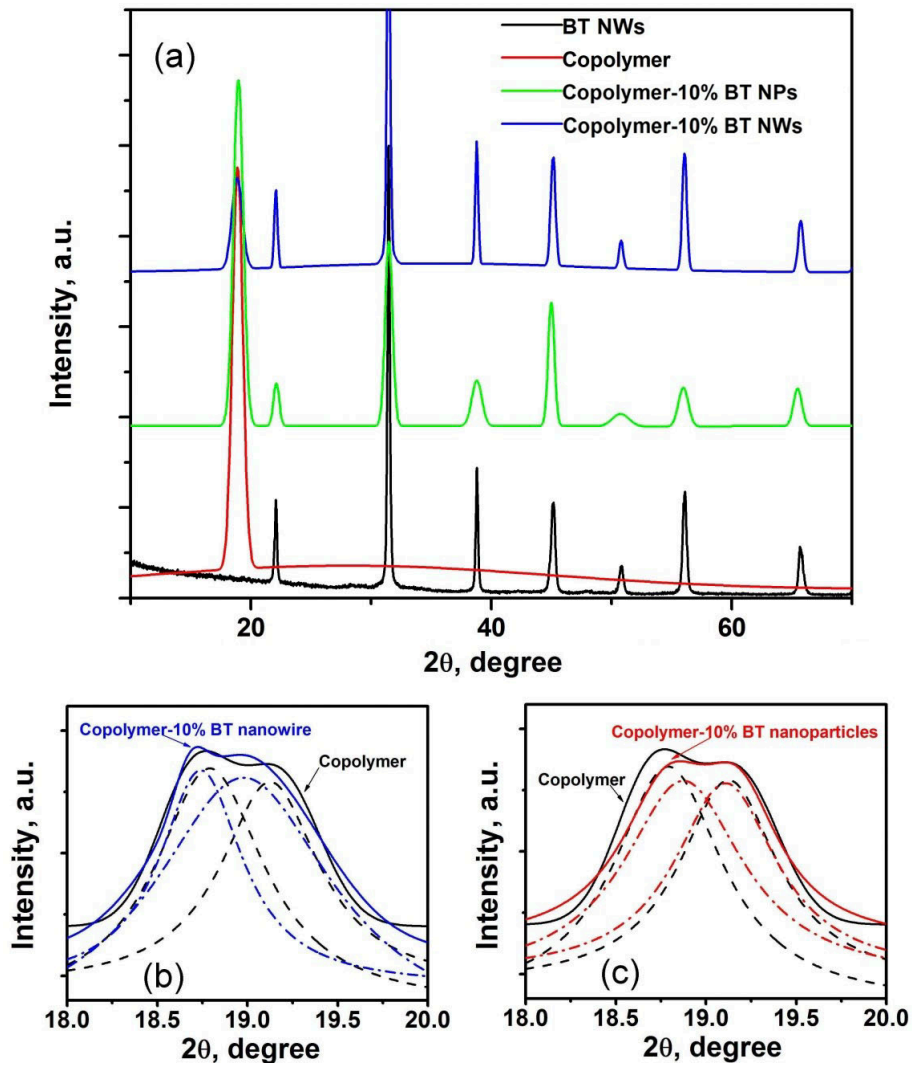

**Figure S1.** (a) The XRD patterns of BT nanowires, P(VDF-TrFE) and P(VDF-TrFE)-BT nanocomposites containing BT nanowires or BT nanoparticles. (b) The effects of BT nanowires on the (110) peaks of P(VDF-TrFE) matrix. (c) The effects of BT nanoparticles on the (110) peaks of P(VDF-TrFE) matrix.

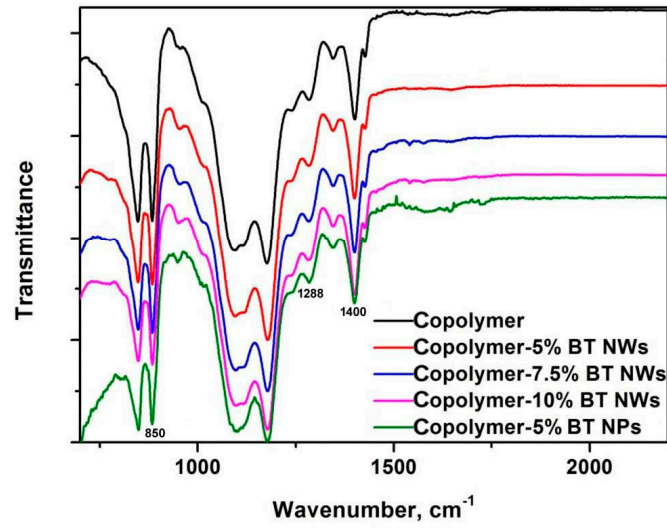

**Figure S2.** The FT-IR spectra of P(VDF-TrFE) and P(VDF-TrFE)-BT nanocomposites containing BT nanowires (NWs) or BT nanoparticles (NPs). The signals corresponding to the polar  $\beta$  phase in P(VDF-TrFE) are indicated.

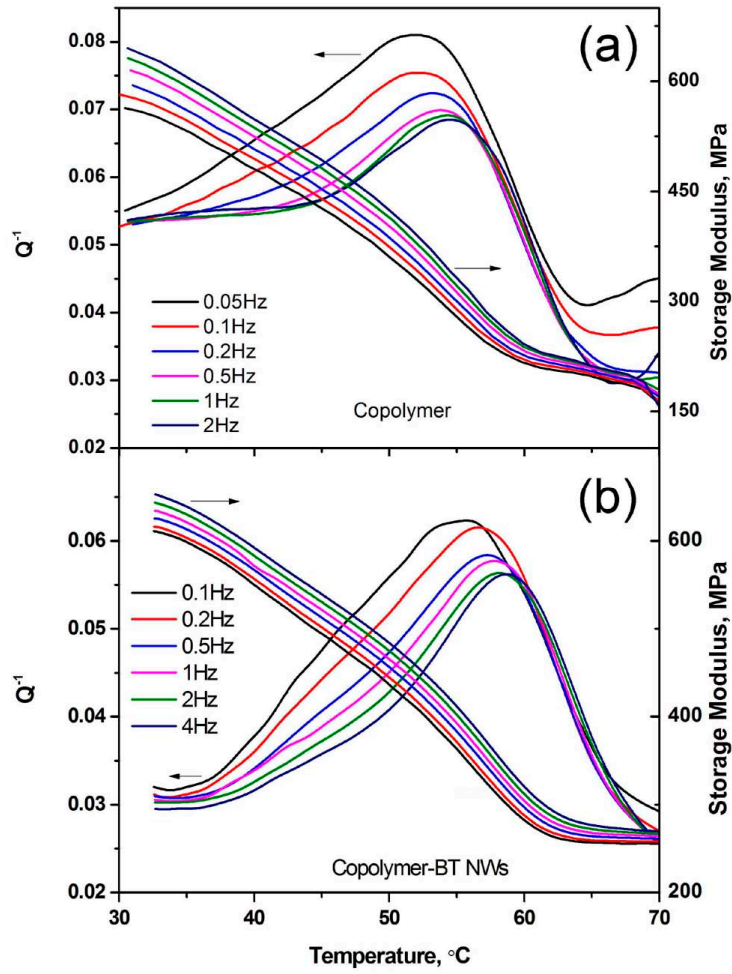

**Figure S3.** Mechanical loss ( $Q^{-1}$ ) and storage modulus of P(VDF-TrFE) (a), and P(VDF-TrFE)-BTNW nanocomposite containing 5% volume fraction of BT nanowires (b).
